# Supplementary material for: High-Throughput Microbial Community Analyses to Establish a Natural Fungal and Bacterial Consortium from Sewage Sludge Enriched with Three Pharmaceutical Compounds
Source: MDPI journal article supplement (doi:10.3390/jof8070668), 2022-06-25
Supplement: s1 [file s1]

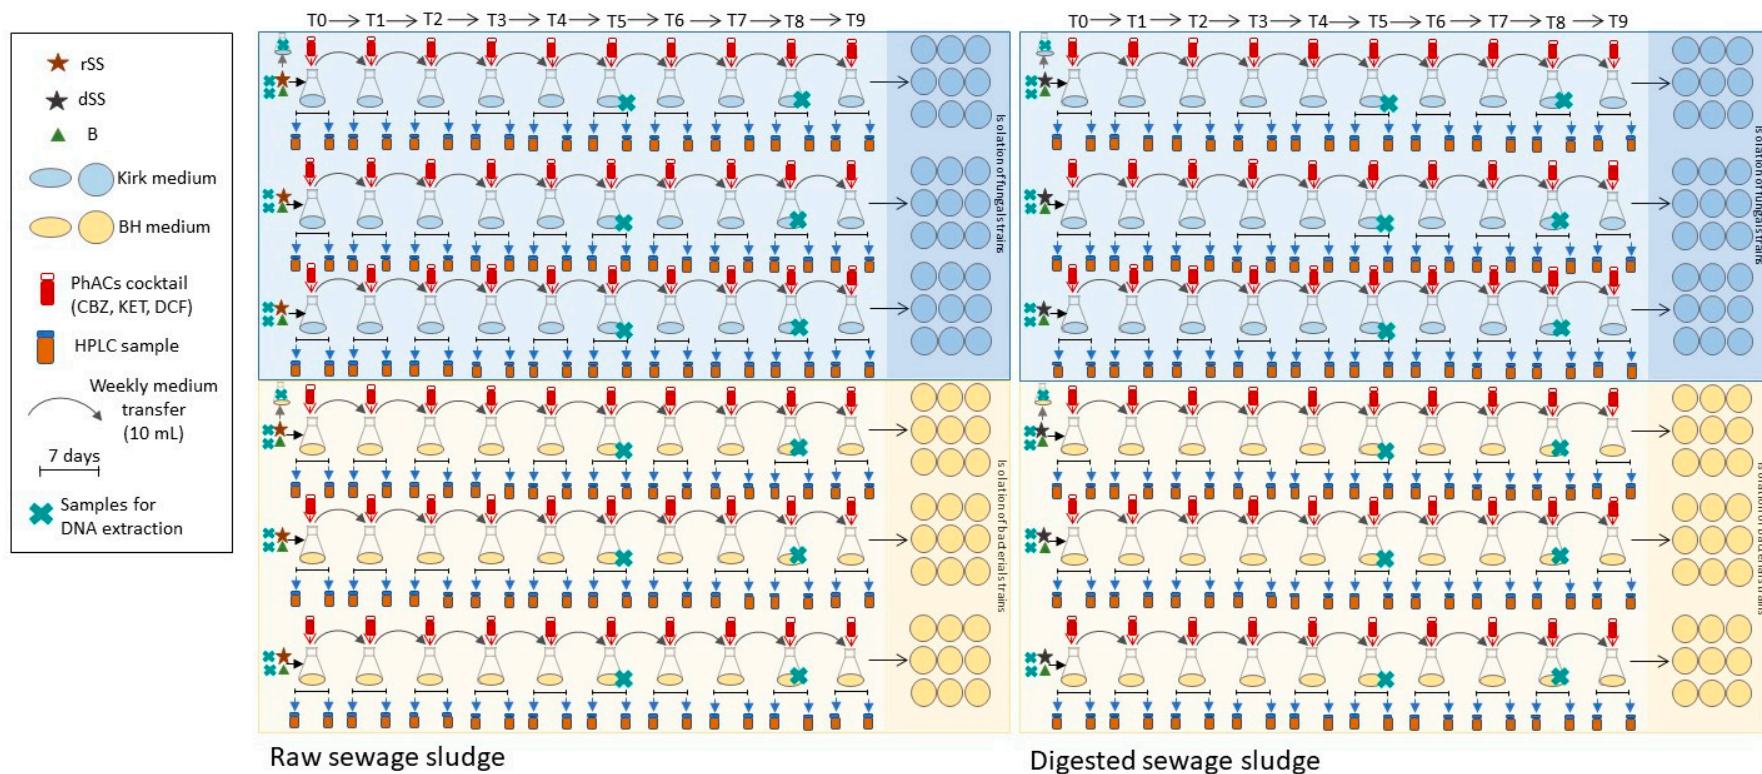

**Figure S1.** Workflow of the selective pressure experiment set-up. Brown stars represent raw sewage sludge (rSS), dark grey stars represent digested sewage sludge (dSS), green triangle represent bulking agent (B). Arrows shown the transfer and small vials represent when the PhACs were added (dark red vial) and when the samples for HPLC were taken (blue cap vials). The time-scale is represented with a straight line between flasks and corresponds to 1 week. Blue crosses indicate when samples were taken for DNA and sequencing analysis. Light blue represents those flasks where modified Kirk medium was used and light yellow for BH medium. Isolation was performed in the final flask in the appropriate media.

Table S1. Composition of modified Kirk medium used in the selective pressure experiment.

| Compound                                                                          | g/L    |
|-----------------------------------------------------------------------------------|--------|
| Glucose                                                                           | 5      |
| Yeast extract                                                                     | 1      |
| Peptone                                                                           | 2      |
| Ammonium tartrate                                                                 | 2      |
| KH <sub>2</sub> PO <sub>4</sub>                                                   | 0.2    |
| MgSO <sub>4</sub> · 7H <sub>2</sub> O                                             | 0,5    |
| KCl                                                                               | 0,5    |
| Mineral solution                                                                  | 1 (mL) |
| Mineral solution                                                                  | g/L    |
| B <sub>4</sub> O <sub>7</sub> Na <sub>2</sub> ·10H <sub>2</sub> O                 | 0.1 g  |
| CuSO <sub>4</sub> ·5H <sub>2</sub> O                                              | 0.01   |
| FeSO <sub>4</sub> ·7H <sub>2</sub> O                                              | 0.05   |
| MnSO <sub>4</sub> ·7H <sub>2</sub> O                                              | 0.01   |
| ZnSO <sub>4</sub> ·7H <sub>2</sub> O                                              | 0.07   |
| (NH <sub>4</sub> ) <sub>6</sub> Mo <sub>7</sub> O <sub>24</sub> 4H <sub>2</sub> O | 0.01   |

Table S2. Composition of BH medium used in the selective pressure experiment.

| Compound                                        | g/L  |
|-------------------------------------------------|------|
| MgSO <sub>4</sub>                               | 0.2  |
| CaCl <sub>2</sub>                               | 0.02 |
| KH <sub>2</sub> PO <sub>4</sub>                 | 1    |
| K <sub>2</sub> HPO <sub>4</sub>                 | 1    |
| (NH <sub>4</sub> ) <sub>2</sub> SO <sub>4</sub> | 1    |
| FeCl <sub>3</sub>                               | 0.05 |

Table S3. Summary metric of fungal community in the bioinformatic pipeline.

Table S3.1 Summary metric of fungal community analyses.

| Metric             | Sample    |
|--------------------|-----------|
| Number of samples  | 34        |
| Number of features | 1,449     |
| Total frequency    | 1,443,807 |

Table S3.2. Frequency per sample.

| Frequency per Sample |           |
|----------------------|-----------|
| Minimum frequency    | 880.0     |
| 1st quartile         | 5,941.75  |
| Median frequency     | 42,332.0  |
| 3rd quartile         | 58,658.75 |
| Maximum frequency    | 147,374.0 |

|                |                    |
|----------------|--------------------|
| Mean frequency | 42,464.91176470588 |
|----------------|--------------------|

Table S3.3 Frequency per feature

| Frequency per feature |                  |
|-----------------------|------------------|
|                       | Frequency        |
| Minimum frequency     | 1.0              |
| 1st quartile          | 32.0             |
| Median frequency      | 88.0             |
| 3rd quartile          | 274.0            |
| Maximum frequency     | 71,053.0         |
| Mean frequency        | 996.416149068323 |

Table S3.4. Ratios (%) of sequences retained after the denoising process using DADA2 for the pipeline flows applied to the data.

|                        | Demultiplexed | DADA2  |            |
|------------------------|---------------|--------|------------|
|                        | Number        | Number | % Retained |
| <b>Samples</b>         | 11            | 11     | 100.00     |
| <b>Total sequences</b> | 1866191       | 318247 | 17,05      |
| <b>Av seq/sample</b>   | 169654        | 28931  | 17,05      |
| <b>Max sequences</b>   | 240058        | 60086  | 25,03      |
| <b>Min sequences</b>   | 93640         | 41567  | 44,39      |
| <b>Total features</b>  | -             | 290    | 100        |

Table S4. Summary metric of bacterial community analyses in the bioinformatic pipeline.

Table S4.1. Frequency per Sample.

| Metric             | Sample    |
|--------------------|-----------|
| Number of samples  | 34        |
| Number of features | 5,114     |
| Total frequency    | 3,875,414 |

Table S4.2. Frequency per sample.

| Frequency per Sample |                     |
|----------------------|---------------------|
| Minimum frequency    | 11,629.0            |
| 1st quartile         | 68,015.0            |
| Median frequency     | 108,523.0           |
| 3rd quartile         | 150,170.25          |
| Maximum frequency    | 248,936.0           |
| Mean frequency       | 113,982.76470588235 |

Table S4.3 Frequency per feature

| Frequency per feature |           |
|-----------------------|-----------|
|                       | Frequency |

|                   |                   |
|-------------------|-------------------|
| Minimum frequency | 1.0               |
| 1st quartile      | 14.0              |
| Median frequency  | 48.0              |
| 3rd quartile      | 176.0             |
| Maximum frequency | 379,462.0         |
| Mean frequency    | 757.8048494329292 |

Table S4.4. Ratios (%) of sequences retained after the denoising process using DADA2 for the pipeline flows applied to the data.

|                        | <b>Demultiplexed</b> | <b>DADA2</b>  |                   |
|------------------------|----------------------|---------------|-------------------|
|                        | <b>Number</b>        | <b>Number</b> | <b>% Retained</b> |
| <b>Samples</b>         | 11                   | 11            | 100.0             |
| <b>Total sequences</b> | 1735722              | 1197039       | 68,96             |
| <b>Av seq/sample</b>   | 157793               | 108822        | 68,96             |
| <b>Max sequences</b>   | 240058               | 147641        | 61,50             |
| <b>Min sequences</b>   | 93642                | 76201         | 81,37             |
| <b>Total features</b>  | -                    | 806           | 100               |
